# Supplementary material for: Characteristics of Adults With Type 2 Diabetes Mellitus by Category of Chronic Kidney Disease and Presence of Cardiovascular Disease in Alberta Canada: A Cross-Sectional Study
Source: PubMed Central journal article supplement — Can J Kidney Health Dis. 2019 Jun 13;6:2054358119854113. doi: 10.1177/2054358119854113 (PMC6572900; doi:10.1177/2054358119854113), 2019-06-13
Supplement: Supplemental_Figures_and_tables.pdf [file Supplemental_Figures_and_tables.pdf]

### Supplemental Figure S1. Participant flow

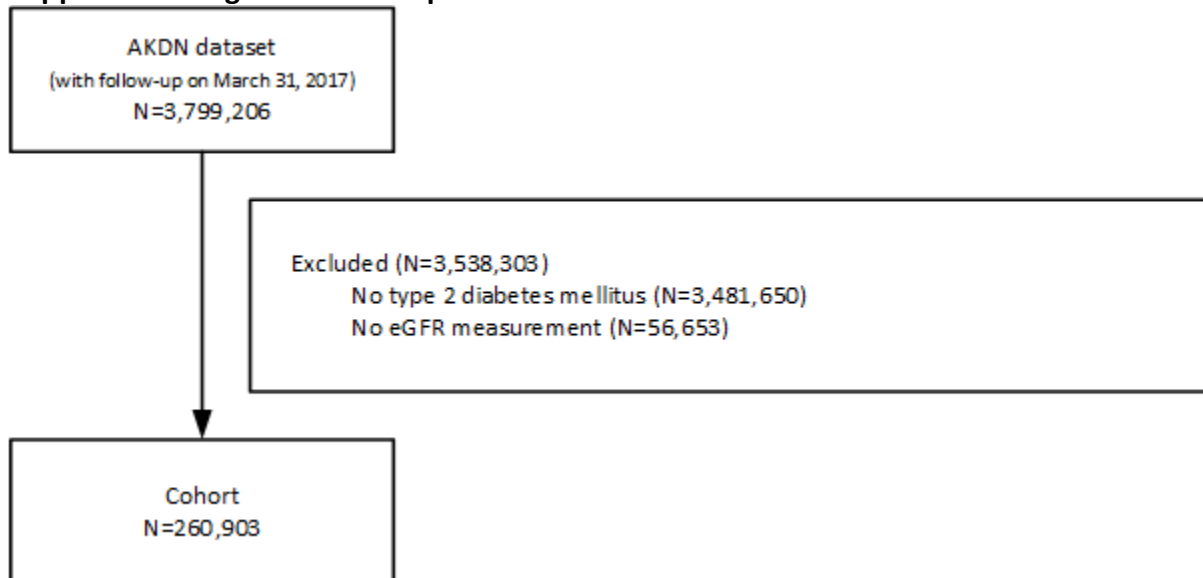

AKDN Alberta Kidney Disease Network

### Supplemental Table S1. Glomerular filtration rate overall and by age and gender

| Population                                        | Overall           | Age, years       |                  |                  |                  | Gender           |                  |
|---------------------------------------------------|-------------------|------------------|------------------|------------------|------------------|------------------|------------------|
|                                                   |                   | <65              | ≥65              | 65-74            | ≥75              | Female           | Male             |
| <b>Overall</b>                                    | 260,903           | 139,568          | 121,335          | 66,472           | 54,863           | 121,129          | 139,774          |
| <b>eGFR,<br/>mL/min*1.73m<sup>2</sup><br/>≥90</b> | 96,902<br>(37.1)  | 83,443<br>(59.8) | 13,459<br>(11.1) | 12,272<br>(18.5) | 1,187<br>(2.2)   | 46,350<br>(38.3) | 50,552<br>(36.2) |
| <b>60-89</b>                                      | 112,705<br>(43.2) | 47,391<br>(34.0) | 65,314<br>(53.8) | 38,862<br>(58.5) | 26,452<br>(48.2) | 49,237<br>(40.6) | 63,468<br>(45.4) |
| <b>45-59</b>                                      | 29,069<br>(11.1)  | 5,140<br>(3.7)   | 23,929<br>(19.7) | 9,633<br>(14.5)  | 14,296<br>(26.1) | 14,336<br>(11.8) | 14,733<br>(10.5) |
| <b>30-44</b>                                      | 14,698<br>(5.6)   | 1,871<br>(1.3)   | 12,827<br>(10.6) | 3,792<br>(5.7)   | 9,035<br>(16.5)  | 7,580<br>(6.3)   | 7,118<br>(5.1)   |
| <b>&lt;30</b>                                     | 7,529 (2.9)       | 1,723<br>(1.2)   | 5,806<br>(4.8)   | 1,913<br>(2.9)   | 3,893<br>(7.1)   | 3,626<br>(3.0)   | 3,903<br>(2.8)   |

eGFR estimated glomerular filtration rate N (%) are reported

**Supplemental Table S2. Anti-hyperglycemic class by CKD stage (monotherapy only)**

| Anti-hyperglycemic class         | Overall          | No CKD, eGFR     |                  |                  | CKD stages      |                 |                 |                 |                 |
|----------------------------------|------------------|------------------|------------------|------------------|-----------------|-----------------|-----------------|-----------------|-----------------|
|                                  |                  | >60              | >90              | 60-89            | 1               | 2               | 3a              | 3b              | 4/5             |
| <b>Overall</b>                   | 260,903          | 174,920          | 81,383           | 93,537           | 15,519          | 19,168          | 29,069          | 14,698          | 7,529           |
| <b>DPP-4 inhibitor</b>           | 553 (0.2)        | 296 (0.2)        | 87 (0.1)         | 209 (0.2)        | 11 (0.1)        | 30 (0.2)        | 85 (0.3)        | 65 (0.4)        | 66 (0.9)        |
| <b>GLP-1 receptor agonist</b>    | 202 (0.1)        | 164 (0.1)        | 86 (0.1)         | 78 (0.1)         | 9 (0.1)         | 3 (0.0)         | 19 (0.1)        | 6 (0.0)         | 1 (0.0)         |
| <b>Insulin</b>                   | 9,087<br>(3.5)   | 5,057<br>(2.9)   | 3,022<br>(3.7)   | 2,035<br>(2.2)   | 555<br>(3.6)    | 653<br>(3.4)    | 878<br>(3.0)    | 837<br>(5.7)    | 1,107<br>(14.7) |
| <b>Biguanide (metformin)</b>     | 50,889<br>(19.5) | 36,152<br>(20.7) | 15,555<br>(19.1) | 20,597<br>(22.0) | 2,701<br>(17.4) | 3,886<br>(20.3) | 5,668<br>(19.5) | 2,138<br>(14.5) | 344<br>(4.6)    |
| <b>SGLT2 inhibitor</b>           | 319 (0.1)        | 267 (0.2)        | 134 (0.2)        | 133 (0.1)        | 26 (0.2)        | 7 (0.0)         | 15 (0.1)        | 4 (0.0)         | 0 (0.0)         |
| <b>Sulfonylureas</b>             | 1,779<br>(0.7)   | 858 (0.5)        | 275 (0.3)        | 583 (0.6)        | 53 (0.3)        | 129<br>(0.7)    | 292<br>(1.0)    | 267<br>(1.8)    | 180<br>(2.4)    |
| <b>Meglitinide (repaglinide)</b> | 561 (0.2)        | 156 (0.2)        | 44 (0.1)         | 112 (0.2)        | 6 (0.0)         | 19 (0.1)        | 58 (0.2)        | 102<br>(0.7)    | 220<br>(2.9)    |
| <b>Other</b>                     | 212 (0.1)        | 130 (0.1)        | 41 (0.1)         | 89 (0.1)         | 6 (0.0)         | 12 (0.1)        | 31 (0.1)        | 20 (0.1)        | 13 (0.2)        |

CKD chronic kidney disease, DPP-4 Dipeptidyl peptidase-4, eGFR estimated glomerular filtration rate, GLP-1 Glucagon-like peptide-1, SGLT2 Sodium-glucose linked transporter 2 N (%) are reported

**Supplemental Table S3. Anti-hyperglycemic class by CKD stage**

| Anti-hyperglycemic class         | Overall           | No CKD, eGFR     |                  |                  | CKD stages      |                  |                  |                 |                 |
|----------------------------------|-------------------|------------------|------------------|------------------|-----------------|------------------|------------------|-----------------|-----------------|
|                                  |                   | >60              | >90              | 60-89            | 1               | 2                | 3a               | 3b              | 4/5             |
| <b>Overall</b>                   | 260,903           | 174,920          | 81,383           | 93,537           | 15,519          | 19,168           | 29,069           | 14,698          | 7,529           |
| <b>DPP-4 inhibitor</b>           | 30,884<br>(11.8)  | 18,910<br>(10.8) | 9,156<br>(11.3)  | 9,754<br>(10.4)  | 2,675<br>(17.2) | 3,176<br>(16.6)  | 3,513<br>(12.1)  | 1,875<br>(12.8) | 735<br>(9.8)    |
| <b>GLP-1 receptor agonist</b>    | 6,322<br>(2.4)    | 4,405<br>(2.5)   | 2,576<br>(3.2)   | 1,829<br>(2.0)   | 698<br>(4.5)    | 533 (2.8)        | 465 (1.6)        | 182<br>(1.2)    | 39 (0.5)        |
| <b>Insulin</b>                   | 39,746<br>(15.2)  | 21,436<br>(12.3) | 10,831<br>(13.3) | 10,605<br>(11.3) | 3,385<br>(21.8) | 4,381<br>(22.9)  | 5,021<br>(17.3)  | 3,285<br>(22.3) | 2,238<br>(29.7) |
| <b>Biguanide (metformin)</b>     | 125,205<br>(48.0) | 81,395<br>(46.5) | 37,423<br>(46.0) | 43,972<br>(47.0) | 9,317<br>(60.0) | 11,975<br>(62.5) | 14,587<br>(50.2) | 6,501<br>(44.2) | 1,430<br>(19.0) |
| <b>SGLT2 inhibitor</b>           | 19,808<br>(7.6)   | 13,623<br>(7.8)  | 7,271<br>(8.9)   | 6,352<br>(6.8)   | 2,178<br>(14.0) | 2,022<br>(10.5)  | 1,538<br>(5.3)   | 397<br>(2.7)    | 50 (0.7)        |
| <b>Sulfonylureas</b>             | 37,491<br>(14.4)  | 22,237<br>(12.7) | 10,217<br>(12.6) | 12,020<br>(12.9) | 3,146<br>(20.3) | 4,004<br>(20.9)  | 4,735<br>(16.3)  | 2,509<br>(17.1) | 860<br>(11.4)   |
| <b>Meglitinide (repaglinide)</b> | 9,732<br>(3.7)    | 4,818<br>(5.3)   | 1,982<br>(2.4)   | 2,836<br>(3.0)   | 682<br>(4.4)    | 997 (5.2)        | 1,347<br>(4.6)   | 1,038<br>(7.1)  | 850<br>(11.3)   |
| <b>Combination</b>               | 79,400<br>(30.4)  | 47,745<br>(27.3) | 22,961<br>(28.2) | 24,784<br>(26.5) | 6,894<br>(44.4) | 8,449<br>(44.1)  | 9,558<br>(32.9)  | 4,980<br>(33.9) | 1,774<br>(23.6) |
| <b>Other</b>                     | 5,030<br>(1.9)    | 3,005<br>(1.7)   | 1,208<br>(1.5)   | 1,797<br>(1.9)   | 297<br>(1.9)    | 505 (2.6)        | 712 (2.4)        | 374<br>(2.5)    | 137<br>(1.8)    |

CKD chronic kidney disease, DPP-4 Dipeptidyl peptidase-4, eGFR estimated glomerular filtration rate, GLP-1 Glucagon-like peptide-1, SGLT2 Sodium-glucose linked transporter 2 N (%) are reported

**Supplemental Table S4. Anti-hyperglycemic class by prior CVD**

| Anti-hyperglycemic class         | Prior CVD        |                  |                 |                  |
|----------------------------------|------------------|------------------|-----------------|------------------|
|                                  | CVD              | CAD              | PAD             | Stroke/TIA       |
| <b>N</b>                         | 58,595           | 27,395           | 8,772           | 33,733           |
| <b>DPP-4 inhibitor</b>           | 6,524<br>(11.1)  | 3,374<br>(12.3)  | 830 (9.5)       | 3,337 (9.9)      |
| <b>GLP-1 receptor agonist</b>    | 1,017<br>(1.7)   | 501 (1.8)        | 109 (1.2)       | 531 (1.6)        |
| <b>Insulin</b>                   | 11,118<br>(19.0) | 5,716<br>(20.9)  | 1,886<br>(21.5) | 6,029<br>(17.9)  |
| <b>Biguanide (metformin)</b>     | 27,868<br>(47.6) | 14,071<br>(51.4) | 3,506<br>(40.0) | 15,053<br>(44.6) |
| <b>SGLT2 inhibitor</b>           | 3,679<br>(6.3)   | 1,975<br>(7.2)   | 440 (5.0)       | 1,818 (5.4)      |
| <b>Sulfonylureas</b>             | 8,663<br>(14.8)  | 4,510<br>(16.5)  | 1,061<br>(12.1) | 4,586<br>(13.6)  |
| <b>Meglitinide (repaglinide)</b> | 2,892<br>(4.9)   | 1,408<br>(5.1)   | 473 (5.4)       | 1,642 (4.9)      |
| <b>Combination</b>               | 18,545<br>(31.6) | 9,648<br>(35.2)  | 2,466<br>(28.1) | 9,822<br>(29.1)  |
| <b>Other</b>                     | 1,002<br>(1.7)   | 417 (1.5)        | 136 (1.6)       | 590 (1.7)        |

DPP-4 Dipeptidyl peptidase-4, GLP-1 Glucagon-like peptide-1, A1C glycated hemoglobin, SGLT2 Sodium-glucose linked transporter 2, T2DM type 2 diabetes mellitus N (%) are reported
